# Supplementary material for: Morphological Characteristics of the Thymus and Spleen and the Subpopulation Composition of Lymphocytes in Peripheral Blood during Systemic Inflammatory Response in Male Rats with Different Resistance to Hypoxia
Source: Hindawi journal article supplement (doi:10.1155/2019/7584685), 2019-04-01
Supplement: f1 [file 7584685.f1.pdf]

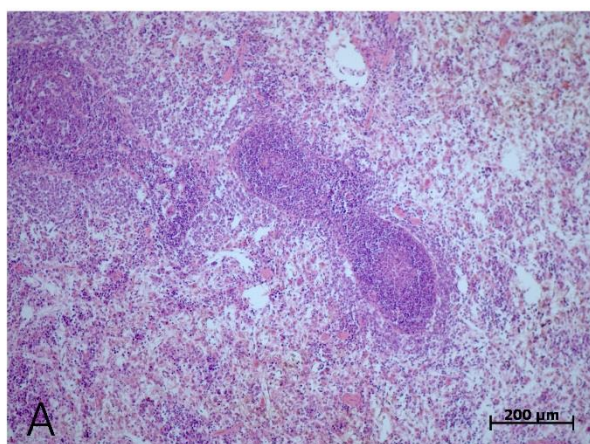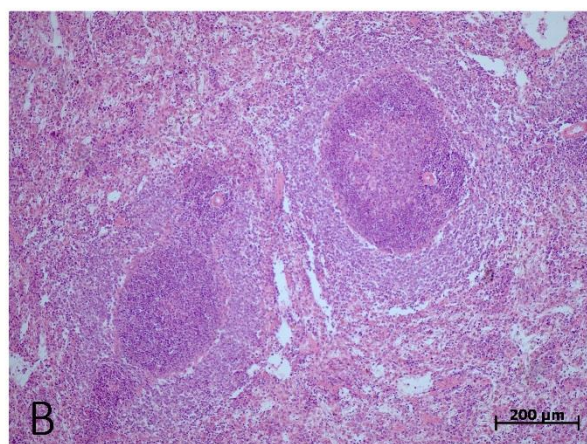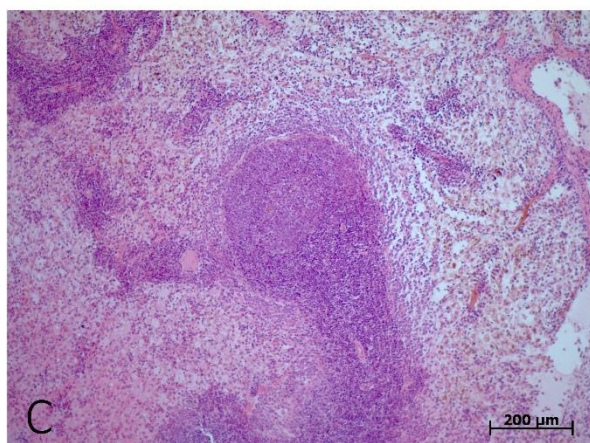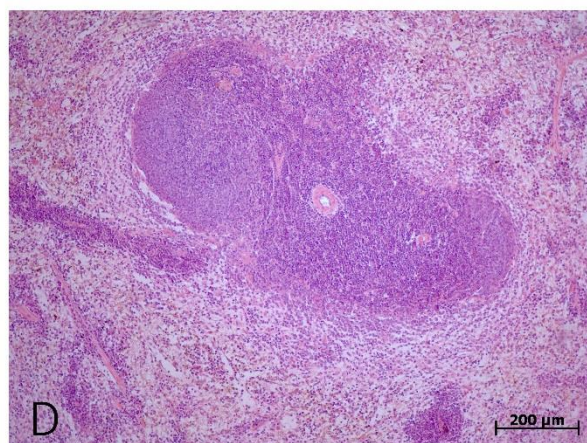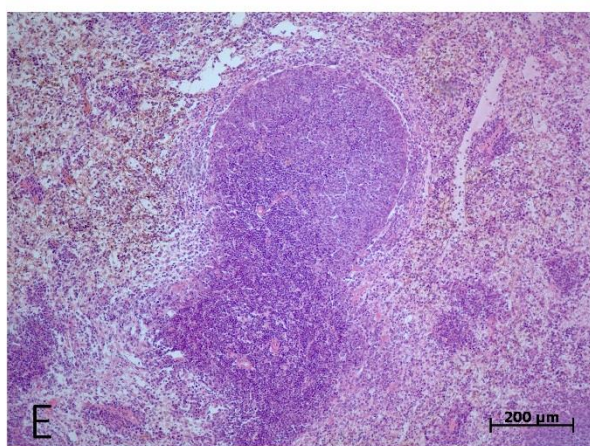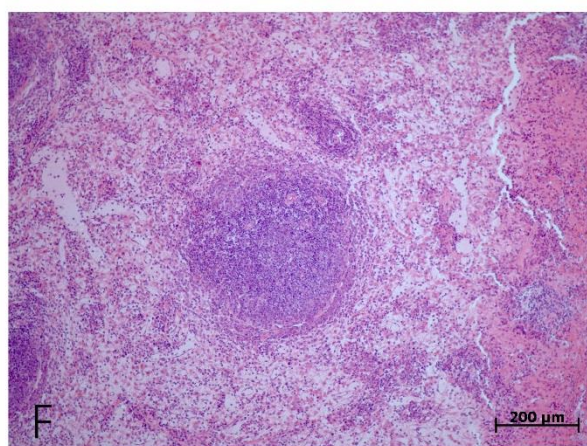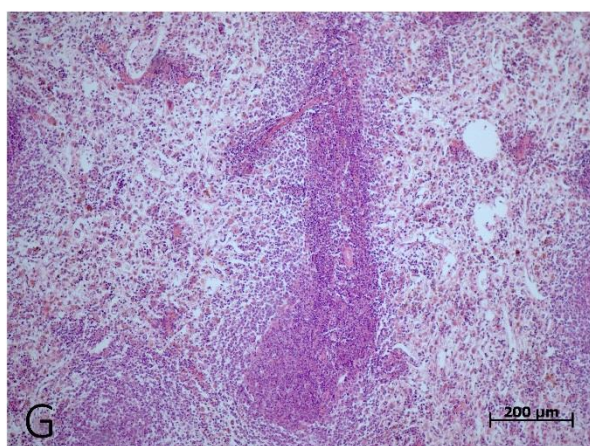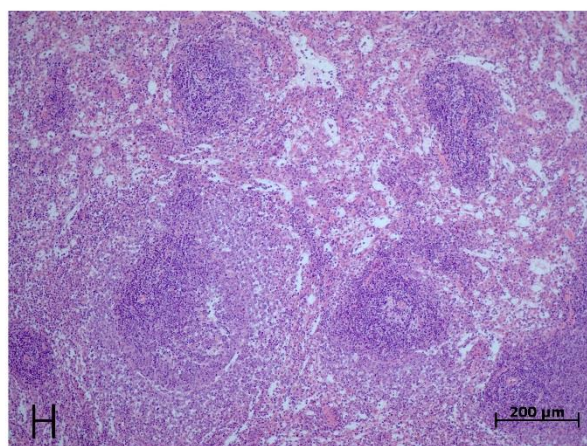



Figure S1: Morphological changes in the spleen of tolerant and susceptible to hypoxia male Wistar rats after 3, 6 and 24 hours of LPS administration. Haematoxylin and eosin staining. Original magnification 100x.

(A) Tolerant to hypoxia rat, control group – the white pulp is represented by the PALS and lymphoid follicles with germinal centers, the marginal zone of lymphoid follicles is pronounced.

(B) - Susceptible to hypoxia rat, control group – lymphoid follicles of white pulp are large with wide germinal centers, the marginal zone of lymphoid follicles is wide, represented by 12-14 rows of lymphocytes.

(C) Tolerant to hypoxia rat, 3h LPS – PALS is pronounced, large lymphoid follicle with a wide germinal center, marginal zone is narrow.

(D) Susceptible to hypoxia rat, 3h LPS – PALS is pronounced, large lymphoid follicle with a wide germinal center, marginal zone is narrow.

(E) Tolerant to hypoxia rat, 6h LPS – PALS is pronounced, large lymphoid follicle with a wide germinal center, marginal zone is narrow.

(F) Susceptible to hypoxia rat, 6h LPS – devastation of the white pulp, PALS is not pronounced, lymphoid follicle with large germinal center, marginal zone of lymphoid follicle is narrow, represented by 4-5 rows of lymphocytes.

(G) Tolerant to hypoxia rat, 24h LPS – pronounced devastation of white pulp, PALS is not pronounced, lymphoid follicle is small, without a germinal center, marginal zone is represented by 5-6 rows of lymphocytes.

(H) Susceptible to hypoxia rat, 24h LPS – white pulp prevails, PALS is wide, lymphoid follicles with wide marginal zones, represented by 9-10 rows of lymphocytes.
